# Supplementary material for: Bacillus species are core microbiota of highly resistant maize varieties that induce host metabolic defense against corn stalk rot
Source: Research Square preprint supplement (doi:10.21203/rs.3.rs-3400607/v1), 2023-10-11
Supplement: Supplementary file 1 [file b35bf2a2dacffaadf6412938.xlsx]

## Sheet: Supplementary Table 1
Supplementary Table 1. Detailed pedigree information and CSR disease indexes for two consecutive years for 40 cultivars obtained from an association mapping panel consisting of 551 diverse inbred lines.
Maize inbred lines					2020						2021
Detailed information					Control			With Fusarium			Control			With Fusarium
ID	Lines	Pedigree	Origin	Subpopulations	All	Disease	Rate	All	Disease	Rate	All	Disease	Rate	All	Disease	Rate
19GZL2	CIMBL139	(TX03-1004-179-B)-B	CIMMY	TST	14	0	0	15	0	0	4	0	0	13	1	0.0769231
19GZL3	CIMBL144	(TX03-1007-18-B)-B	CIMMY	SS	8	0	0	11	0	0	18	0	0	10	1	0.1
19GZL4	CML116	P45(STE)C1F36-5-1-3-1-BB	CIMMY	Mixed	8	0	0	11	0	0	9	0	0	11	1	0.0909
19GZL6	CML326	P45C6F6-2-1-1-B*5	CIMMY	TST	8	0	0	15	0	0	13	0	0	18	2	0.1111
19GZL13	CIMBL154	(TZI18-BBBB)-B	CIMMY	Mixed	9	0	0	8	1	0.125	9	0	0	16	1	0.0625
19GZL16	BT1	8085×Thai Hybrid	China	TST	14	0	0	14	0	0	15	0	0	14	1	0.0714
19GZL32	CIMBL73	(CML329/MBR C3 AmF25-2-1-1-BBB)-B	CIMMY	TST	22	0	0	20	1	0.05	22	0	0	20	1	0.05
19GZL34	CML191	G34QH146-1-1-4-B	CIMMY	TST	16	0	0	20	0	0	-	-	-	-	-	-
19GZL38	CIMBL61	Carotenoid Syn3-FS11-4-3	CIMMY	TST	7	0	0	12	0	0	8	0	0	12	1	0.0833
19GZL54(R1)	CIMBL10	(((CML 408 / B104) x (CML411/ B104))-1-1-BB)-B	CIMMY	TST	11	0	0	11	0	0	5	0	0	14	0	0
19GZL73	CIMBL42	((NC300/Tx772)-B-1-B2-BB)-B	CIMMY	TST	19	0	0	17	2	0.117647	4	0	0	17	0	0
19GZL94	GEMS58	ARI01150:N04-696-1-B	USA	NSS	10	0	0	10	0	0	11	0	0	9	0	0
19GZL103	Zong31	Synthetic	China	NSS	7	0	0	8	0	0	17	0	0	16	1	0.0625
19GZL113	HTH-17	HuoTangBai42×Hai1917	China	NSS	10	0	0	7	0	0	16	0	0	19	0	0
19GZL165(S1)	Si444	A619×HuangZaoSi	China	NSS	20	0	0	19	9	0.473684	9	0	0	14	6	0.428571
19GZL166	By4944	BHO	China	NSS	14	2	0.142857	12	0	0	15	0	0	12	2	0.1667
19GZL185(R2)	975-12	78698×Dan9046	China	Mixed	13	0	0	12	0	0	16	0	0	20	0	0
19GZL195	Liao138	Improved from Dan340	China	NSS	14	0	0	13	0	0	7	0	0	20	1	0.05
19GZL200(S2)	B77	B77-3	China	Mixed	18	10	0.555556	16	13	0.8125	5	0	0	14	7	0.5
19GZL207	U8112	American Hybrid 3382	China	SS	22	0	0	18	0	0	9	0	0	14	0	0
19GZL225	GEMS55	ARI16035:S02-443-1-B-B	USA	SS	18	5	0.277778	18	8	0.444444	17	0	0	16	1	0.0625
19GZL238	Mo17	187-2×C103	China	NSS	21	2	0.0952381	18	2	0.111111	11	0	0	16	0	0
19GZL260	Si273	American Hybrid	China	NSS	14	0	0	13	1	0.0769231	4	0	0	8	0	0
19GZL263	ZH68	American Hybrid P78599	China	SS	13	0	0	15	0	0	18	0	0	13	1	0.0769231
19GZL278	CIMBL154	(TZI18-BBBB)-B	CIMMY	Mixed	11	5	0.454545	15	11	0.733333	-	-	-	-	-	-
19GZL288	Gy237	AIHO	China	NSS	16	1	0.0625	15	4	0.266667	6	0	0	17	2	0.117647
19GZL291	Shen137	American Hybrid 6JK611	China	NSS	14	0	0	20	0	0	10	0	0	9	0	0
19GZL300	Chang7-2	HuangZaoSi×WeiChun	China	Mixed	16	2	0.125	9	2	0.222222	10	0	0	16	0	0
19GZL301	CIMBL123	(P72c1xCML-297 x CL-02410-3-1-1-BBB)-B	CIMMY	TST	20	0	0	21	0	0	4	0	0	13	0	0
19GZL304	CIMBL44	((SYN-Y-STR-34-1-1-1-1-2-1-BBBBB/NC354/SYN-Y-STR-34-1-1-1-1-2-1-BBBBB)-S2-13	CIMMY	TST	18	0	0	15	0	0	15	0	0	12	2	0.166667
19GZL331(S3)	Zheng58	Variant plants from Ye478	China	NSS	20	3	0.15	15	5	0.333333	18	0	0	16	8	0.5
19GZL339(R3)	CIMBL122	Unknown	Unknown	Unknown	17	1	0.0588235	19	0	0	7	0	0	11	0	0
19GZL356	Liao159	Unknown	China	Mixed	15	0	0	18	2	0.111111	4	0	0	9	0	0
19GZL362	Ye52106	(Ye1075×Ye106)×AiJin525	China	NSS	19	2	0.105263	16	1	0.0625	10	0	0	3	0	0
19GZL365	Zong3	Synthetic	China	NSS	15	0	0	19	0	0	9	0	0	7	1	0.142857
19GZL366	ZZ03	Unknown	China	NSS	11	0	0	19	0	0	6	0	0	4	0	0
19GZL455(R4)	Zheng32	American Single-cross 3382	China	SS	10	0	0	18	0	0	1	0	0	6	0	0
19GZL483	Zheng58	Variant plants from Ye478	China	NSS	18	0	0	21	1	0.047619	17	0	0	16	1	0.0625
19GZL533(S4)	H21	HuangZaoSi×H84	China	Mixed	24	9	0.375	15	10	0.666667	14	0	0	6	4	0.666667
19GZL537	Ye488	U8112×Shen5003	China	Mixed	0	0	0	0	0	0	4	0	0	2	0	0

## Sheet: Supplementary Table 2
Supplementary Table 2. Results of the linear mixed model analysis to examine which factors primarily shape the maize microbiota.
Index	Variables	Bacteria			Fungi
		F value	df	P	F value	df	P
Shannon	Ecological niches	200.99	4	2.2e-16	47.307	4	2.2e-16
	Resistibility	1.0702	1	0.3418	9.8938	1	0.02039
	Cultivar	1.5611	7	0.4447	1.5906	7	0.1405
	Ecological niches and Resistibility	3.5111	4	0.008677	19.8867	4	1.338e-13
	Ecological niches and Cultivar	0.8895	28	0.629	4.7867	28	9.284e-11

## Sheet: Supplementary Table 3
Supplementary Table 3. Wilcox test results between resistant and susceptible groups among the five niches.
16S/ITS	niches	group1	mean1	median1	group2	mean2	median2	p_value	p_adjust
16S	BS	BSR	-1.96989	-2.11525	BSS	-1.70756	-1.70871	0.0026044	0.0026044
	RS	RSR	-2.10964	-2.38156	RSS	-1.80473	-1.91015	0.0133663	0.0133663
	RE	RER	0.165582	-0.952807	RES	-1.3794	-1.40537	1.49806e-08	1.49806e-08
	SE	SER	-0.352962	-0.864649	SES	-1.20367	-1.17758	1.04188e-05	1.04188e-05
	GE	GER	-0.552439	-0.922401	GES	-0.414815	-1.00637	0.336713	0.336713
ITS	BS	BSR	-0.776413	-0.982761	BSS	-0.566761	-0.67536	0.0895733	0.0895733
	RS	RSR	-0.683588	-0.675741	RSS	-0.517875	-0.669438	0.292271	0.292271
	RE	RER	-0.752197	-0.804579	RES	-0.406594	-0.696828	0.100463	0.100463
	SE	SER	-0.747968	-0.888454	SES	-0.924877	-1.02859	0.0857597	0.0857597
	GE	GER	-0.825474	-0.829542	GES	-1.13601	-1.27768	0.0037453	0.0037453

## Sheet: Supplementary Table 4
Supplementary Table 4. Tukey's multiple comparisons test of the SDIs comparing two niches
B/F	Tukey's multiple comparisons test	Mean Diff.	95.00% CI of diff.	Significant	Summary	Adjusted P Value
Bacteria	BS vs. RS	-0.745	-1.439 to -0.0511	Yes	*	0.0285
	BS vs. RE	2.768	2.065 to 3.471	Yes	****	<0.0001
	BS vs. SE	2.318	1.624 to 3.012	Yes	****	<0.0001
	BS vs. GE	5.572	4.878 to 6.266	Yes	****	<0.0001
	RS vs. RE	3.513	2.81 to 4.216	Yes	****	<0.0001
	RS vs. SE	3.063	2.369 to 3.756	Yes	****	<0.0001
	RS vs. GE	6.317	5.623 to 7.011	Yes	****	<0.0001
	RE vs. SE	-0.4501	-1.153 to 0.2528	No	ns	0.3981
	RE vs. GE	2.804	2.101 to 3.507	Yes	****	<0.0001
	SE vs. GE	3.254	2.561 to 3.948	Yes	****	<0.0001
Fungi	BS vs. RS	-0.09226	-0.6958 to 0.5113	No	ns	0.9934
	BS vs. RE	1.781	1.17 to 2.393	Yes	****	<0.0001
	BS vs. SE	0.8788	0.2753 to 1.482	Yes	***	0.0008
	BS vs. GE	2.165	1.562 to 2.769	Yes	****	<0.0001
	RS vs. RE	1.873	1.262 to 2.485	Yes	****	<0.0001
	RS vs. SE	0.9711	0.3675 to 1.575	Yes	***	0.0002
	RS vs. GE	2.257	1.654 to 2.861	Yes	****	<0.0001
	RE vs. SE	-0.9024	-1.514 to -0.2909	Yes	***	0.0007
	RE vs. GE	0.384	-0.2274 to 0.9954	No	ns	0.4184
	SE vs. GE	1.286	0.6828 to 1.89	Yes	****	<0.0001

## Sheet: Supplementary Table 5
Supplementary Table 5. Pairwise multilevel comparison between two niches using Adonis.
B/F	pairs	F.Model	R2	p.value	p.adjusted
Bactria	BS vs GE	118.185	0.602415	0.001	0.001
	BS vs RE	98.2757	0.563909	0.001	0.001
	BS vs RS	21.6993	0.217647	0.001	0.001
	BS vs SE	87.0906	0.527532	0.001	0.001
	GE vs RE	49.7177	0.395471	0.001	0.001
	GE vs RS	130.765	0.626374	0.001	0.001
	GE vs SE	31.9116	0.290339	0.001	0.001
	RE vs RS	98.5114	0.564498	0.001	0.001
	RE vs SE	27.4885	0.265619	0.001	0.001
	RS vs SE	91.2288	0.539085	0.001	0.001
Fungi	BS vs GE	67.5496	67.5496	0.001	0.01
	BS vs RE	46.0521	46.0521	0.001	0.01
	BS vs RS	4.51983	4.51983	0.001	0.01
	BS vs SE	51.7867	51.7867	0.001	0.01
	GE vs RE	33.8997	33.8997	0.001	0.01
	GE vs RS	72.6752	72.6752	0.001	0.01
	GE vs SE	14.1305	14.1305	0.001	0.01
	RE vs RS	40.536	40.536	0.001	0.01
	RE vs SE	25.1694	25.1694	0.001	0.01
	RS vs SE	51.8647	51.8647	0.001	0.01

## Sheet: Supplementary Table 6
Supplementary Table 6. Pairwise multilevel comparison between resistant and susceptible cultivars in the same niche using Adonis
B/F	pairs	F.Model	R2	p.value	p.adjusted
Bacteria	BSS vs BSR	2.53235	0.0624773	0.039	0.039
	RSS vs RSR	3.19407	0.0775372	0.001	0.001
	RES vs RER	3.08141	0.0788459	0.001	0.001
	SES vs SER	3.38116	0.0817077	0.001	0.001
	GES vs GER	1.7827	0.0448111	0.085	0.085
Fungi	BSS vs BSR	3.21158	3.21158	0.002	0.002
	RSS vs RSR	2.63077	0.0647481	0.003	0.003
	RES vs RER	3.02795	0.0775843	0.002	0.002
	SES vs SER	8.91568	0.190036	0.001	0.001
	GES vs GER	3.44615	0.0831477	0.009	0.009

## Sheet: Supplementary Table 7
Supplementary Table 7. Statistical information of the syncretic bacterial-fungal co-occurrence networks.
Niches	Total Node	Total Edge	Num. of B-B	Num. of B-F	Num. of F-F	Per of B-B	Per of B-F	Per of F-F
BS-R	517	2416	1142	787	487	0.472682	0.325745	0.201573
BS-S	578	3786	2686	800	300	0.709456	0.211305	0.0792393
RS-R	589	3810	2157	1273	380	0.566142	0.334121	0.0997375
RS-S	578	2703	1280	1012	411	0.473548	0.374399	0.152053
RE-R	328	2983	1862	897	224	0.624204	0.300704	0.0750922
RE-S	301	2027	1348	486	193	0.665022	0.239763	0.0952146
SE-R	455	2782	1482	714	586	0.53271	0.25665	0.21064
SE-S	375	4869	2668	1645	556	0.547956	0.337852	0.114192
GE-R	168	937	498	213	226	0.531483	0.227321	0.241195
GE-S	174	1303	563	162	579	0.43208	0.124328	0.444359

## Sheet: Supplementary Table 8
Supplementary Table 8. Numbers of shared OTUs and unique edges plus their dissimilarity between CSR-R and CSR-S maize inbred lines in the five ecological niches.
	Shared OTUs	Shared Edges	Unique OTUs in R	Unique OTUs in S	Unique Edges in R	Unique Edges in S	Dissimilarity of networks
BSR vs. BSS	379	97	138	199	2319	3689	0.96872
RSR vs. RSS	418	129	171	160	3681	2574	0.960387
RER vs. RES	216	92	112	85	2891	1935	0.963274
SER vs. SES	296	178	159	79	2604	4691	0.95347
GER vs. GES	111	105	57	63	832	1198	0.90625

## Sheet: Supplementary  Table 9
Supplementary Table 9. Taxonomies of the 276 isolates from two CSR-resistant maize inbred lines based on 16S rRNA gene sequencing.
ID	Maize inbred lines	Isolates ID	Isolates ID2	Taxonomy
1	339	A116-1	asv1	Pseudarthrobacter defluvii
2	339	A116-1	asv2	Pseudarthrobacter defluvii
3	339	A39	asv3	Agrobacterium fabrum
4	339	A38	asv4	Brucella pseudogrignonensis
5	339	A54	asv5	Brucella pseudogrignonensis
6	339	A71	asv6	Brucella pseudogrignonensis
7	339	A77	asv7	Burkholderia puraquae
8	339	A120	asv8	Burkholderia puraquae
9	339	A103	asv9	Burkholderia stabilis
10	339	A85	asv10	Leifsonia shinshuensis
11	339	A75	asv11	Luteibacter jiangsuensis
12	339	A107	asv12	Peribacillus muralis
13	339	A5	asv13	Agrobacterium fabrum
14	339	A20	asv14	Agrobacterium fabrum
15	339	A31	asv15	Agrobacterium fabrum
16	339	A50	asv16	Agrobacterium fabrum
17	339	A52-2	asv17	Agrobacterium fabrum
18	339	A111	asv18	Agrobacterium fabrum
19	339	A14	asv19	Agrobacterium salinitolerans
20	339	A28	asv20	Arthrobacter oryzae
21	339	A88	asv21	Arthrobacter oryzae
22	339	A98	asv22	Arthrobacter oryzae
23	339	A37	asv23	Arthrobacter pokkalii
24	339	A63	asv24	Arthrobacter pokkalii
25	455	A8	asv25	Arthrobacter sp. B1045
26	455	E1	asv26	Arthrobacter sp. B1045
27	455	d10	asv27	Arthrobacter sp. C29
28	455	H12	asv28	Arthrobacter sp. HR108
29	455	A4	asv29	Arthrobacter sp. RC1.1?
30	455	A11	asv30	Arthrobacter sp. RC1.1?
31	455	b6	asv31	Arthrobacter sp. strain CK1
32	455	H11	asv32	Arthrobacter sp. ZQW-102
33	455	e4	asv33	Arthrobacter sp. ZQW-102
34	455	h5	asv34	Bacillus aerius strain CH2-D42-30
35	339	A99	asv35	Bacillus anthracis
36	339	A7	asv36	Bacillus anthracis
37	339	A16	asv37	Bacillus anthracis
38	339	A116-2	asv38	Bacillus anthracis
39	339	A45-2	asv39	Bacillus anthracis
40	339	A47	asv40	Bacillus anthracis?
41	455	44	asv41	Bacillus aryabhattai strain 1-Sj-5-1-20-M
42	455	41-①	asv42	Bacillus aryabhattai strain NBRIYN4.4
43	455	E9	asv43	Bacillus aryabhattai strain QH16-25
44	339	A87	asv44	Bacillus cereus
45	339	A113-1	asv45	Bacillus cereus
46	339	A49-2	asv46	Bacillus cereus
47	339	A65	asv47	Bacillus cereus
48	455	11	asv48	Bacillus cereus strain 44
49	455	45	asv49	Bacillus cereus strain 44
50	455	40-②	asv50	Bacillus cereus strain CLY07
51	455	25-②	asv51	Bacillus cereus strain K1M12
52	455	1-①	asv52	Bacillus cereus strain MOB-3
53	455	27	asv53	Bacillus cereus strain R25-17
54	455	48-②	asv54	Bacillus cereus strain T3M16
55	455	14	asv55	Bacillus cereus strain T3M17
56	455	47	asv56	Bacillus cereus strain T3M17
57	455	36	asv57	Bacillus cereus strain XaM19
58	455	16	asv58	Bacillus cereus strain XS 24-5
59	455	43	asv59	Bacillus cereus strain XS 24-5
60	455	H2-①	asv60	Bacillus huizhouensis strain JZY2-12
61	455	B4	asv61	Bacillus hunanensis strain CB15
62	455	H7	asv62	Bacillus hunanensis strain CB15
63	455	H10	asv63	Bacillus hunanensis strain CB15
64	455	61	asv64	Bacillus megaterium strain DOS-CAP-4
65	455	d12	asv65	Bacillus megaterium strain DOS-CAP-4
66	455	F11	asv66	Bacillus megaterium strain DW21
67	455	e5	asv67	Bacillus megaterium strain JN6
68	455	32-①	asv68	Bacillus megaterium strain JYW3
69	455	F10-①	asv69	Bacillus megaterium strain ML258
70	455	a8	asv70	Bacillus megaterium strain ML258
71	455	33-②	asv71	Bacillus mycoides strain LUTUUS-AF1
72	455	28	asv72	Bacillus proteolyticus strain 1372
73	455	33-①	asv73	Bacillus proteolyticus strain 1372?
74	455	D6	asv74	Bacillus pumilus strain 13
75	455	46	asv75	Bacillus pumilus strain HTI 3
76	455	e2	asv76	Bacillus pumilus strain ML105
77	455	e10	asv77	Bacillus simplex strain FJAT-28951
78	455	50	asv78	Bacillus sp. (in: Bacteria) CSBXZR4.1
79	455	F7	asv79	Bacillus sp. (in: Bacteria) strain 1142
80	455	B10	asv80	Bacillus sp. (in: Bacteria) strain 5-L3?
81	455	10	asv81	Bacillus sp. (in: Bacteria) strain C1
82	455	32-②	asv82	Bacillus sp. (in: Bacteria) strain C1?
83	455	A2	asv83	Bacillus sp. (in: Bacteria) strain C28?
84	455	41-②	asv84	Bacillus sp. (in: Bacteria) strain FJAT-25557
85	455	42-①	asv85	Bacillus sp. (in: Bacteria) strain HX2016002
86	455	d2	asv86	Bacillus sp. (in: Bacteria) strain JSM?
87	455	24	asv87	Bacillus sp. (in: Bacteria) strain SNH-K57
88	455	26	asv88	Bacillus sp. (in: Bacteria) strain SP9?
89	455	37	asv89	Bacillus sp. (in: Bacteria) strain WWvii8
90	455	G6	asv90	Bacillus sp. 210_27
91	455	B8	asv91	Bacillus sp. BS8
92	455	39	asv92	Bacillus sp. By187(B)Ydz-hh
93	455	38	asv93	Bacillus sp. hb21
94	455	13	asv94	Bacillus sp. Iri 4/1b
95	455	E12	asv95	Bacillus sp. SIIB_Cu_R4
96	455	G2	asv96	Bacillus sp. strain FJAT-29804
97	455	25-①	asv97	Bacillus sp. strain FJAT-29804?
98	455	G5	asv98	Bacillus sp. strain JN1
99	455	19	asv99	Bacillus sp. strain KF-18?
100	455	53	asv100	Bacillus sp. strain KF-18?
101	455	56	asv101	Bacillus sp. strain KF-18?
102	455	1-②	asv102	Bacillus sp. strain P1616
103	455	D2	asv103	Bacillus sp. strain P1616
104	455	h9	asv104	Bacillus sp. strain SZ169
105	455	h8	asv105	Bacillus sp. strain SZ177
106	455	5	asv106	Bacillus sp. T2(2013)
107	455	a9	asv107	Bacillus sp. YH6
108	455	12-①	asv108	Bacillus thuringiensis partial
109	455	6	asv109	Bacillus thuringiensis strain 1039
110	455	29	asv110	Bacillus thuringiensis strain CP-10
111	455	d5	asv111	Bacterium strain BS0703
112	455	C5-②	asv112	Bacterium strain BS0793
113	455	F10-②	asv113	Bacterium strain BS1328?
114	455	G10-①	asv114	Bacterium strain BS1512
115	455	h11	asv115	Bacterium strain BS1512
116	339	A26	asv116	Bosea robiniae
117	339	A110	asv117	Brucella pseudogrignonensis
118	455	52	asv118	Burkholderia ambifaria strain BJQ0010
119	455	H8	asv119	Burkholderia ambifaria strain CR22
120	339	A52-1	asv120	Burkholderia cepacia
121	339	A1	asv121	Burkholderia cepacia ATCC 25416
122	339	A12	asv122	Burkholderia cepacia ATCC 25416
123	339	A58	asv123	Burkholderia cepacia ATCC 25416
124	455	f1	asv124	Burkholderia contaminans strain ILQ216?
125	339	A3	asv125	Burkholderia puraquae
126	339	A6	asv126	Burkholderia puraquae
127	339	A15	asv127	Burkholderia puraquae
128	339	A17	asv128	Burkholderia puraquae
129	339	A18	asv129	Burkholderia puraquae
130	339	A34	asv130	Burkholderia puraquae
131	339	A48	asv131	Burkholderia puraquae
132	339	A49-1	asv132	Burkholderia puraquae
133	339	A53	asv133	Burkholderia puraquae
134	339	A55	asv134	Burkholderia puraquae
135	339	A86	asv135	Burkholderia puraquae
136	339	A93	asv136	Burkholderia puraquae
137	339	A94	asv137	Burkholderia puraquae
138	339	A95	asv138	Burkholderia puraquae
139	339	A101	asv139	Burkholderia puraquae
140	339	A102	asv140	Burkholderia puraquae
141	339	A59	asv141	Burkholderia puraquae?
142	455	h10	asv142	Burkholderia pyrrocinia strain A12
143	339	A44	asv143	Burkholderia stabilis
144	339	A76	asv144	Burkholderia stabilis
145	455	E10	asv145	Chungangia sp. strain QX-3?
146	455	c7	asv146	Escherichia coli C2
147	455	f10	asv147	Escherichia coli strain EGI112
148	455	c11	asv148	Escherichia coli strain EGI311
149	455	a4	asv149	Escherichia fergusonii strain EGI32
150	455	b2	asv150	Escherichia fergusonii strain LWIS 6
151	455	f12	asv151	Escherichia fergusonii strain T3-1
152	339	A27	asv152	Herbaspirillum huttiense
153	339	A118	asv153	Leifsonia lichenia
154	339	A43	asv154	Leifsonia shinshuensis
155	339	A45-3	asv155	Leifsonia shinshuensis
156	339	A104	asv156	Leifsonia shinshuensis
157	339	A30	asv157	Leifsonia xyli subsp. Cynodontis
158	339	A100	asv158	Leifsonia xyli subsp. Cynodontis
159	339	A56	asv159	Microbacterium luticocti DSM 19459
160	455	D12	asv160	Microbacterium phyllosphaerae strain WR36
161	455	15	asv161	Microbacterium sp. strain CpTa8-2b
162	455	b3	asv162	Paenibacillus amylolyticus strain GMXG-11
163	455	d6	asv163	Paenibacillus cucumis Kampfer
164	455	21	asv164	Paenibacillus lautus strain NA-13
165	455	22	asv165	Paenibacillus sp. CH2-1
166	455	E7	asv166	Paenibacillus sp. JNUCC-32
167	455	a12	asv167	Paenibacillus sp. strain S10
168	339	A74	asv168	Paraburkholderia caribensis
169	339	A33	asv169	Paraburkholderia phenoliruptrix
170	339	A35	asv170	Paraburkholderia phenoliruptrix?
171	339	A11	asv171	Priestia aryabhattai B8W22
172	339	A13	asv172	Priestia aryabhattai B8W22
173	339	A29	asv173	Priestia aryabhattai B8W22
174	339	A40	asv174	Priestia aryabhattai B8W22
175	455	A1	asv175	Pseudarthrobacter chlorophenolicus strain 07-OD13
176	455	E3	asv176	Pseudarthrobacter chlorophenolicus strain 07-OD13
177	455	E6	asv177	Pseudarthrobacter chlorophenolicus strain 07-OD13
178	455	a1-②	asv178	Pseudarthrobacter chlorophenolicus strain 07-OD13
179	455	e8	asv179	Pseudarthrobacter chlorophenolicus strain 07-OD13
180	455	F1-②	asv180	Pseudarthrobacter chlorophenolicus strain 07-OD13?
181	339	A22	asv181	Pseudarthrobacter defluvii
182	339	A23	asv182	Pseudarthrobacter defluvii
183	339	A24	asv183	Pseudarthrobacter defluvii
184	339	A67	asv184	Pseudarthrobacter defluvii
185	339	A84	asv185	Pseudarthrobacter defluvii
186	339	A42	asv186	Pseudarthrobacter phenanthrenivorans Sphe3
187	455	E8-②	asv187	Pseudomonas extremorientalis strain CNU082017
188	455	C1	asv188	Pseudomonas koreensis strain 30B3
189	455	D4	asv189	Pseudomonas koreensis strain 30B3
190	455	E4	asv190	Pseudomonas koreensis strain 30B3
191	455	G7	asv191	Pseudomonas koreensis strain 30B3
192	455	G9	asv192	Pseudomonas koreensis strain 30B3
193	455	G12	asv193	Pseudomonas koreensis strain 30B3
194	455	60	asv194	Pseudomonas koreensis strain B17-12
195	455	B1	asv195	Pseudomonas koreensis strain FJAT-hcl-11
196	455	B11	asv196	Pseudomonas koreensis strain FJAT-hcl-11
197	455	D1	asv197	Pseudomonas koreensis strain FJAT-hcl-11
198	455	C6	asv198	Pseudomonas koreensis strain IAE23
199	455	D9-①	asv199	Pseudomonas koreensis strain IAE23
200	455	D11	asv200	Pseudomonas koreensis strain IAE23
201	455	E8-①	asv201	Pseudomonas koreensis strain IAE23
202	455	a5	asv202	Pseudomonas koreensis strain IRP20
203	455	4	asv203	Pseudomonas koreensis strain Ps 9-14
204	455	B7	asv204	Pseudomonas koreensis strain Ps 9-14
205	455	B9	asv205	Pseudomonas koreensis strain Ps 9-14
206	455	E5	asv206	Pseudomonas koreensis strain Ps 9-14
207	455	F3	asv207	Pseudomonas koreensis strain Ps 9-14
208	455	d8	asv208	Pseudomonas koreensis strain Ps 9-14
209	455	g11	asv209	Pseudomonas koreensis strain Ps 9-14
210	455	C9	asv210	Pseudomonas koreensis strain Ps 9-14?
211	455	59	asv211	Pseudomonas koreensis strain SSG5
212	455	A6	asv212	Pseudomonas koreensis strain SSG5
213	455	A9	asv213	Pseudomonas koreensis strain SSG5
214	455	A10	asv214	Pseudomonas koreensis strain SSG5
215	455	B2	asv215	Pseudomonas koreensis strain SSG5
216	455	B5	asv216	Pseudomonas koreensis strain SSG5
217	455	C2	asv217	Pseudomonas koreensis strain SSG5
218	455	C11	asv218	Pseudomonas koreensis strain SSG5
219	455	D3	asv219	Pseudomonas koreensis strain SSG5
220	455	D7	asv220	Pseudomonas koreensis strain SSG5
221	455	D8	asv221	Pseudomonas koreensis strain SSG5
222	455	E11	asv222	Pseudomonas koreensis strain SSG5
223	455	F5	asv223	Pseudomonas koreensis strain SSG5
224	455	F9	asv224	Pseudomonas koreensis strain SSG5
225	455	G11-①	asv225	Pseudomonas koreensis strain SSG5
226	455	H4	asv226	Pseudomonas koreensis strain SSG5
227	455	C7	asv227	Pseudomonas koreensis strain SSG6
228	455	C12	asv228	Pseudomonas koreensis strain SSG6
229	455	g2	asv229	Pseudomonas koreensis strain SSG6
230	455	C10	asv230	Pseudomonas koreensis strain SSG6?
231	455	A7	asv231	Pseudomonas palleroniana strain WJB39?
232	455	E2	asv232	Pseudomonas putida strain DSQ4
233	455	B12	asv233	Pseudomonas sp. PRGB06
234	455	g10	asv234	Pseudomonas sp. S2134
235	455	40-①	asv235	Pseudomonas sp. S2134?
236	455	A3	asv236	Pseudomonas sp. strain 3-18
237	455	C3	asv237	Pseudomonas sp. strain 3-18
238	455	F6	asv238	Pseudomonas sp. strain 3-18
239	455	G10-②	asv239	Pseudomonas sp. strain 3-18
240	455	51	asv240	Pseudomonas sp. strain RP-S-6
241	455	h2-②	asv241	Pseudomonas sp. THG-T1
242	455	D5	asv242	Pseudomonas sp. Vr14
243	455	H1	asv243	Rahnella sp. G7
244	455	g6	asv244	Rahnella sp. G7
245	455	42-②	asv245	Rahnella sp. G7?
246	455	54	asv246	Rahnella sp. Z2-S1
247	455	H3	asv247	Rahnella sp. Z2-S1
248	455	G3	asv248	Rahnella sp. Z2-S1?
249	339	A81	asv249	Ralstonia mannitolilytica
250	339	A4	asv250	Ralstonia pickettii
251	339	A21	asv251	Ralstonia pickettii
252	339	A51	asv252	Ralstonia pickettii
253	339	A69	asv253	Ralstonia pickettii
254	339	A78	asv254	Ralstonia pickettii
255	339	A82	asv255	Ralstonia pickettii
256	339	A92	asv256	Ralstonia pickettii
257	339	A97	asv257	Ralstonia pickettii
258	339	A105	asv258	Ralstonia pickettii
259	339	A62	asv259	Ralstonia pickettii
260	455	h7	asv260	Ralstonia pickettii strain 1-12
261	339	A89	asv261	Rhizobium miluonense
262	455	g4	asv262	Select seq MK823981.1
263	455	35	asv263	Sporosarcina koreensis strain 2-DE-D45-60?
264	339	A36	asv264	Sporosarcina luteola
265	339	A61	asv265	Sporosarcina luteola
266	339	A66	asv266	Sporosarcina luteola
267	455	H9	asv267	Sporosarcina luteola strain B?
268	455	B3	asv268	Sporosarcina luteola strain BT244
269	455	h3	asv269	Sporosarcina luteola strain BT244
270	455	20-②	asv270	Sporosarcina sp. strain SNH-K22
271	339	A79	asv271	Staphylococcus warneri
272	455	B6	asv272	Uncultured bacterium clone D1-57
273	455	48-①	asv273	Uncultured Gammaproteobacteria bacterium clone Chel4-2-28?
274	455	f9	asv274	Uncultured Paenibacillus sp. clone MJJ-21
275	339	A41	asv275	Variovorax guangxiensis
276	339	A83	asv276	Variovorax guangxiensis

## Sheet: Supplementary Table 10
Supplementary Table 10. GSEA enrichment results from maize roots treated with SC-I, SC-II or SC-III.
SCI	ID	Description	setSize	enrichmentScore	NES	pvalue	p.adjust	qvalues	rank	leading_edge	core_enrichment
	zma04075	Plant hormone signal transduction	292	-0.393565	-1.5703	0.00126582	0.00126582	0.0253901	5266	tags=32%, list=21%, signal=25%	100382859/541641/100279789/100285744/100217305/103634643/100280241/100304074/103642379/100381549/100191412/100383126/100279873/100273108/100279481/100280716/100279375/103642058/103641361/100281196/100383168/100283318/100192007/100502393/103626102/541670/100216941/100194025/100272950/103650745/100272504/100502433/103627198/100283620/100383078/100502540/100193967/100216590/100502387/100384496/10027…
	zma04626	Plant-pathogen interaction	197	-0.466643	-1.80424	0.00131752	0.00131752	0.0253901	3336	tags=29%, list=14%, signal=25%	103636213/100285592/103655965/542701/100273665/100193184/100285658/100384051/100501504/100191751/100381812/100286243/100280813/103644651/100280890/103649392/100280614/103636577/103639280/103651170/100285141/100384477/100282259/100037783/100282040/100217278/100273276/100285551/100193393/100281015/103640876/100286265/103651472/100136880/100284346/100285225/100279926/103649042/100381981/100283718/10…
	zma04016	MAPK signaling pathway - plant	159	-0.560227	-2.11022	0.00137363	0.00137363	0.0253901	3865	tags=33%, list=16%, signal=28%	100216941/100285024/100279294/100194025/100281756/103641862/100274400/542230/100216590/100279578/103647370/103644651/103649392/541694/103636577/103639280/100285141/100285551/100281015/103638892/100191972/103651472/100136880/100191592/100281825/100275812/103649042/103651289/103627330/100273512/542243/103652527/100281160/103648044/100191919/100281430/100279811/103626849/103651291/103630679/10363358…
	zma00940	Phenylpropanoid biosynthesis	170	-0.444425	-1.68518	0.00137363	0.00137363	0.0253901	4561	tags=41%, list=18%, signal=33%	100276245/542258/100285899/100381820/100192105/542463/100274274/100383323/100272764/100193733/100286338/100125646/542735/100285577/103640218/100285056/103636702/100285877/103637346/100101533/100280862/542663/100216859/100285564/100280077/109946031/100191153/100192761/103643375/100281367/100382033/542505/100216881/100194034/100281286/103633481/100192586/103641348/100285894/103627433/100280551/1001…
	zma00270	Cysteine and methionine metabolism	118	-0.44382	-1.61395	0.00140647	0.00140647	0.0253901	2980	tags=24%, list=12%, signal=21%	542191/100281255/103643555/100279553/103631673/103646970/107521951/100194360/100283015/100193148/100273458/100216585/100217270/542136/100276369/103628892/542137/103648899/100279981/103648465/103645417/100191831/103646045/103633793/103634563/542480/541637/110386945
	zma00592	alpha-Linolenic acid metabolism	45	-0.60414	-1.86559	0.00163666	0.00163666	0.0253901	3068	tags=40%, list=12%, signal=35%	732829/103644066/732733/100281822/732815/103647563/100037808/732731/100216803/542163/100279433/732822/103642039/103625850/100281695/100192501/103652794/100037807
	zma03030	DNA replication	56	0.639285	2.24486	0.00269542	0.00269542	0.0253901	4174	tags=59%, list=17%, signal=49%	100193296/103627197/100191506/103648427/100383139/542504/100272286/100280690/100216891/100501077/100273978/542357/100191752/100281587/100285013/100279753/542738/100304310/100285427/103631463/100280726/100383660/103625817/542425/103626668/100282678/100285474/542206/100283481/103654581/100383890/100382167/100384853
	zma03050	Proteasome	78	0.461577	1.73595	0.00301205	0.00301205	0.0253901	9032	tags=68%, list=37%, signal=43%	100217091/100282612/100282158/100282792/100283005/103654920/100283395/100285832/100276453/100282470/100282100/100272427/100382157/100216834/100191154/100282105/100191947/103653823/542160/100037815/100272320/100383510/103627906/100382965/100282303/100284233/100193485/103642042/100384330/542021/100274112/100274928/103645964/100191806/100273594/100282706/100273032/100194311/100193140/100382784/10028…
	zma04145	Phagosome	89	0.474106	1.8245	0.00306748	0.00306748	0.0253901	7792	tags=58%, list=32%, signal=40%	542239/100383576/100382290/541774/542503/100273658/100217058/542732/100192065/103629648/100282032/100037751/103643947/100276798/542418/100280916/542395/103647744/100286306/100280289/100274416/103643294/100381303/542327/100282817/100192024/103639351/100280574/542248/100282544/100272807/542705/100273246/100282598/103651402/100193453/103626681/100283947/100281241/100283291/103632727/103636073/103630…
	zma03008	Ribosome biogenesis in eukaryotes	97	0.408004	1.58828	0.00310559	0.00310559	0.0253901	6998	tags=54%, list=28%, signal=39%	100279072/118473284/100383935/100280396/107521957/103639131/100280230/100273853/100193012/103639139/103645842/100502498/100283975/103625708/100284315/100282167/100193822/100382806/103630487/100194088/103638047/103649956/100273647/109941429/103634670/103633413/118473283/100282843/100272977/100276770/100501489/100303837/109939150/100279258/100193557/100193260/100193917/100279266/103648282/103632249…
	zma03018	RNA degradation	113	0.433313	1.72257	0.00334448	0.00334448	0.0253901	8896	tags=59%, list=36%, signal=38%	103633537/103638336/542736/542707/100283280/100381531/100383372/103633568/100191408/100286241/103631988/100502035/100279262/100282788/103629493/103630633/100285374/103651400/732811/103647427/100274470/100279772/100193495/100282437/100193927/100272835/100280057/100282327/100281429/542316/100194030/100281464/100286339/103654004/100384291/100285420/103627664/103631112/100281965/100502326/100279265/1…
	zma03013	Nucleocytoplasmic transport	133	0.396365	1.62154	0.00340136	0.00340136	0.0253901	9477	tags=65%, list=38%, signal=41%	100502129/100278395/103635497/100286267/100381804/103635498/542555/103625943/100384150/100279122/103635758/100194061/542581/103625708/100280784/100037748/100383460/100382806/100272594/732749/103630277/103643902/100382556/100272607/100273670/103635172/100282843/103647957/100286309/100193503/100191507/100276495/100216910/100384809/100193260/100382780/100282882/100381924/100383288/100381988/10027684…
	zma00902	Monoterpenoid biosynthesis	12	-0.786457	-1.82755	0.00361011	0.00361011	0.0253901	2546	tags=50%, list=10%, signal=45%	100191789/100273237/100281076/732758/100273052/103654934
	zma00010	Glycolysis / Gluconeogenesis	153	0.393749	1.62596	0.00371747	0.00371747	0.0253901	7275	tags=52%, list=29%, signal=37%	103635678/100381624/542376/100857058/542358/542759/542333/100037774/100280449/100191614/100272519/542578/100282738/103651223/100282190/100273990/542721/100281068/100280823/100283452/100192900/100283899/100279373/100283280/100382182/100383599/542363/100282981/100191900/100274483/100274579/103632535/103651489/100273700/100191144/103629493/103630633/100284774/100280296/100170246/118472308/100272913/…
	zma03040	Spliceosome	222	0.323226	1.41722	0.00414938	0.00414938	0.0253901	10296	tags=59%, list=42%, signal=35%	103651028/100502129/103630048/103631172/103635562/100284787/100282036/100193784/100272538/103633373/100285722/107275236/100193568/100284255/100282140/103633413/732749/100283326/100382178/100272607/100501536/100273115/100303837/100192596/100216905/100192821/103650526/100192733/100191855/100272422/100280612/100304252/541962/100279432/109945984/100282926/100193106/100284316/100286339/100283725/10028…
	zma04141	Protein processing in endoplasmic reticulum	243	0.355795	1.58023	0.00444444	0.00444444	0.0253901	6867	tags=40%, list=28%, signal=29%	100196928/100283766/100280576/100281812/100191552/103653979/542723/103651028/100279928/100279881/542602/100216689/100384491/606409/103641662/100382512/100217058/606410/100192699/100274092/542732/606414/100381538/542576/100272685/606413/100217123/100191802/732808/100279736/100382471/103637376/100279874/100282405/103625886/103641411/103647533/103633515/606470/100279534/100276798/100273881/100383593…
	zma01230	Biosynthesis of amino acids	259	0.326481	1.46177	0.00456621	0.00456621	0.0253901	6794	tags=43%, list=28%, signal=32%	100381624/542215/103654943/100192350/100192351/778431/542333/100037774/100193705/100384793/100274119/118473590/100191614/100281038/542400/103630430/100272879/542578/100282625/100273990/100194039/100284089/100280823/100272371/100283452/100283899/100284799/100273023/100283280/100285190/100282981/100191900/100274579/541942/100191334/103646801/100384514/100194338/100273676/100273311/100284589/1002172…
	zma00196	Photosynthesis - antenna proteins	17	0.666587	1.76131	0.00457666	0.00457666	0.0253901	2708	tags=53%, list=11%, signal=47%	100273752/100273427/100282054/103651575/542478/100282512/100280410/542321/100284154
	zma00100	Steroid biosynthesis	31	0.586525	1.82187	0.00496278	0.00496278	0.0253901	2805	tags=39%, list=11%, signal=34%	100191975/100282314/100281761/100282855/100286381/542766/541614/100283692/100274333/100282098/100283632/541682
	zma03010	Ribosome	326	0.652355	2.99513	0.00502513	0.00502513	0.0253901	4086	tags=70%, list=17%, signal=59%	103633018/103652281/103637734/100277147/103643066/542640/100194265/100285769/100191190/542719/100283431/100283364/100502186/100281626/103625791/100283332/103653691/100191607/100280577/100191612/100286294/103635636/100284917/103631585/100193874/100286375/100272465/541668/100281960/100273601/100191314/100280584/100280801/100192505/100282010/100382075/100285759/100193672/100192783/100280220/10019369…
	zma03440	Homologous recombination	58	0.507165	1.7964	0.00544959	0.00544959	0.0262236	7890	tags=60%, list=32%, signal=41%	100273582/100272286/100216934/103650756/103634545/100285013/103645850/103630583/100281664/100285427/103627774/100193464/100280726/100285474/100283481/100216554/541709/100191367/103654581/100382167/100282783/103653563/103651852/100194011/100125648/100383265/103646962/100383032/100285903/100279971/100285910/103641202/103633601/100284087/100274706
	zma00999	Biosynthesis of various plant secondary metabolites; Including: Crocin biosynthesis, Cannabidiol biosynthesis, Mugineic acid biosynthesis, Pentagalloylglucose biosynthesis, Benzoxazinoid biosynthesis, Gramine biosynthesis, Coumarin biosynthesis, Furanocoumarin biosynthesis, Hordatine biosynthesis, Podophyllotoxin biosynthesis	62	-0.50069	-1.64045	0.00625978	0.00625978	0.0287531	2535	tags=23%, list=10%, signal=20%	100272792/103650598/103634742/100194360/100192631/778439/103626358/100193424/100191831/542684/103634563/542480/541637/110386945
	zma00970	Aminoacyl-tRNA biosynthesis	63	0.472117	1.6952	0.00831025	0.00831025	0.0365119	8664	tags=62%, list=35%, signal=40%	100282733/100383520/100282839/100272738/100282419/100194290/100383209/100280512/100383320/100273774/100283444/100279212/100272402/103635898/103647355/103626016/541989/100381695/100279253/103648437/100273907/103643028/100281485/103639438/100281742/100272291/100194117/103645798/100193566/100283555/113687172/100282315/100281059/100273441/100280209/103645723/100285944/100194398/100384866
	zma00061	Fatty acid biosynthesis	48	0.490182	1.65949	0.0106667	0.0106667	0.0435806	5526	tags=42%, list=22%, signal=32%	100273826/100284715/100284776/100284340/100037775/100279917/100193519/100283232/100191192/100280787/100283590/100284513/542319/100280714/103644323/103646607/100284973/103632349/103640823/103654554
	zma00250	Alanine, aspartate and glutamate metabolism	56	0.45467	1.59658	0.0107817	0.0107817	0.0435806	5102	tags=39%, list=21%, signal=31%	542215/100192350/100192351/100193705/100384793/100274119/100191549/100194010/542400/100193220/100282625/100279867/100273311/100191977/100193777/100274106/103636185/103636016/103630426/100286148/103651348/103645841
	zma00563	Glycosylphosphatidylinositol (GPI)-anchor biosynthesis	30	0.538992	1.66161	0.0124378	0.0124378	0.0479969	8254	tags=67%, list=33%, signal=44%	100383527/103627347/100280817/103633205/100193858/100279182/100383334/103647350/100273831/103649951/103629437/100282184/103639027/103627820/100216561/100192477/100275097/100304325/103626518/100275459
	zma00620	Pyruvate metabolism	106	0.36073	1.42034	0.0131148	0.0131148	0.0479969	6049	tags=42%, list=24%, signal=31%	103635678/100857058/542759/100037775/100193663/100191614/100272519/542374/100273990/100283452/100273428/100192900/100283899/100279373/100383599/542363/101202696/100274264/100280767/100274483/100272900/542319/542393/542372/542598/100280189/100284774/100191460/100281571/100193244/606466/541781/100272834/542177/100284493/100282233/100191365/100279871/100501486/542483/100272951/100282283/103644177/10…
	zma00510	N-Glycan biosynthesis	48	0.462867	1.56701	0.0133333	0.0133333	0.0479969	8726	tags=69%, list=35%, signal=45%	100279928/109942894/100279881/103627568/100382512/100192699/100274092/100217123/100191802/100282405/100273881/100383593/100280032/100282615/541686/100194221/103652327/100282286/100282884/100272978/103642037/100502028/100279297/100502340/100280333/100274497/100274447/100274149/100282442/100276684/103629954/100285424/100274516
	zma03420	Nucleotide excision repair	62	0.428673	1.538	0.0137741	0.0137741	0.0479969	8265	tags=53%, list=33%, signal=35%	103627197/100272286/100280690/542357/100285013/100285427/100285960/100280726/103625817/542425/100282678/100283481/100274342/103654581/100383890/100382167/100273893/103635427/103651319/100194011/100282427/100282197/100282897/100279448/100285903/100279971/100285910/103641202/100283179/100381699/100193357/103649912/100281631
	zma00513	Various types of N-glycan biosynthesis	43	0.469651	1.55528	0.0152672	0.0152672	0.0514263	6367	tags=51%, list=26%, signal=38%	100279928/109942894/100279881/100382512/100192699/100274092/103647202/100217123/103655502/100191802/100282405/100273881/732746/100273557/100280032/100282615/541686/100282286/100282884/103642037/100279297/100502340
	zma00900	Terpenoid backbone biosynthesis	66	0.405123	1.46435	0.0168067	0.0168067	0.0547859	6802	tags=39%, list=28%, signal=29%	100285459/103626280/100285783/100384769/541903/100272824/100279817/103627645/100282878/103655501/103643980/103647599/100274033/101202696/101060998/606484/100191244/100279314/100282283/100384063/100273635/103653897/100192945/100191875/103649981/100191922
	zma00920	Sulfur metabolism	37	-0.520377	-1.55694	0.0181818	0.0181818	0.0574163	7861	tags=62%, list=32%, signal=42%	542221/541650/100280321/100284636/100283164/103638079/100275494/103647705/100216722/542438/103625889/100192654/541958/100502310/100191523/103643994/606419/103631673/100285812/103639836/103642918/118473198/103645417
	zma03430	Mismatch repair	38	0.493361	1.60117	0.0205128	0.0205128	0.0614395	7253	tags=58%, list=29%, signal=41%	100272286/542357/100285013/100285427/100280726/103625817/542425/100279876/542006/100282678/100285474/100283481/103654581/100383890/100382167/100381439/100194011/100282197/542626/100285903/100279971/100285910
	zma03410	Base excision repair	40	0.475933	1.55524	0.0206718	0.0206718	0.0614395	7305	tags=52%, list=30%, signal=37%	100383279/103627197/100280690/542357/103640763/100284112/100383660/542425/100284406/103647201/103654581/100383890/100382167/103635146/100273912/100283527/100194011/100282897/732817/100279971/103641202
	zma03060	Protein export	63	0.402655	1.44579	0.0221607	0.0221607	0.0639827	7868	tags=59%, list=32%, signal=40%	109942576/103654352/103630827/100217058/100283769/732808/100192526/103637376/103625886/100276798/100193087/100280916/100382702/100280752/100280289/100382925/100273903/732809/100273900/100192024/103631723/542750/100857020/100284377/100216656/100274280/103641707/103645776/103625723/100191345/100283950/103648919/100384319/100502496/100286182/100282505/118473566
	zma00190	Oxidative phosphorylation	141	0.336525	1.37691	0.0252708	0.0252708	0.0698058	8523	tags=55%, list=35%, signal=36%	100285174/100283003/100273176/100284505/103649017/103630585/100277932/100384742/100384526/100383137/100192065/100279865/100282032/100501351/103647744/100280324/100286306/100274416/542267/542327/100282817/103639351/100277027/103651342/100280574/100282544/542550/100216756/103632998/100273246/100282598/103651402/100282384/100277290/100192808/103626681/100283237/100281241/100283291/100282353/10028544…
	zma01250	Biosynthesis of nucleotide sugars	104	0.354381	1.39208	0.0255591	0.0255591	0.0698058	7058	tags=41%, list=29%, signal=30%	100285497/100191391/542358/100273781/542159/100282677/100382295/542072/100194010/100383496/103651223/542721/100191846/100191463/100303816/100191165/100502178/100274751/103651489/100283428/100272872/100170246/103634175/100383292/118472308/100279549/100274471/100286359/103636300/103649574/100193447/100191862/100272867/100285949/100283867/100283489/109939248/100304323/542107/103655653/542761/1036507…
	zma01210	2-Oxocarboxylic acid metabolism	60	0.406287	1.45796	0.030303	0.030303	0.0805842	6455	tags=47%, list=26%, signal=35%	103654943/100193705/100384793/100274119/100282625/100272371/100284799/100273023/100191334/100384514/100194338/100273676/100273311/100284589/100280189/100281571/100286245/100280203/100216599/100191877/100283064/100274341/100191841/103644325/100501386/100274026/100284902/100283376
	zma00430	Taurine and hypotaurine metabolism	13	-0.674354	-1.58518	0.034358	0.034358	0.0890249	1782	tags=31%, list=7%, signal=29%	100304251/100193552/103631795/103639506
	zma00195	Photosynthesis	50	-0.45401	-1.43116	0.0368	0.0368	0.0929684	3635	tags=44%, list=15%, signal=38%	100191684/100284745/100281226/103647735/100283835/100383080/541791/542279/100273354/100283816/100284876/100283085/100281199/100281679/100275181/100280994/100284847/103625835/100382495/100283327/100281235/100273120
SCII	zma04075	Plant hormone signal transduction	292	-0.399071	-1.47815	0.00124069	0.00124069	0.0539084	3402	tags=22%, list=14%, signal=19%	100383126/100273108/103638584/103643992/100191412/103647411/103636504/100193967/100281196/100284582/100280805/100194025/100285223/103648032/100281007/103627330/103647370/103626859/100273679/103642166/103643117/103653849/100280474/100272726/100285214/103642058/100280867/103638892/100282471/100191972/541694/103636724/103633658/103643602/100285387/103641516/103651132/100384298/100281419/100281845/10…
	zma04626	Plant-pathogen interaction	197	-0.453247	-1.62965	0.00129534	0.00129534	0.0539084	3154	tags=24%, list=13%, signal=21%	100283599/100384473/100272734/100281687/100286243/100280890/100384477/103639280/103636213/541988/103651472/100217278/100501504/100281015/100282040/103638222/100280813/100286265/103640876/103633658/100284346/100273276/100283718/100285225/103648044/103651170/100136880/100280614/100279926/103647581/100382070/103649042/100281430/100281160/103649392/103636275/100191738/103644651/118475108/103636541/10…
	zma04016	MAPK signaling pathway - plant	159	-0.57356	-2.01279	0.00134771	0.00134771	0.0539084	2877	tags=29%, list=12%, signal=26%	100272734/542230/100194025/100285223/100275812/100284192/103627330/103639280/100274400/103647370/103651472/100281015/100193598/100281756/103638892/100191972/541694/103633658/103641516/103648044/100216590/100136880/100279578/100279811/103649042/100383941/103652527/100281430/100281160/103649392/100191919/103644651/118475108/542243/100273512/103626849/103636541/103630680/100281558/103630679/10364604…
	zma00196	Photosynthesis - antenna proteins	17	0.796444	1.98644	0.00230947	0.00230947	0.0599401	1572	tags=65%, list=6%, signal=61%	100280410/100281791/100282054/542478/100273427/100273752/103651575/542320/100193833/100281248/542321
	zma00250	Alanine, aspartate and glutamate metabolism	56	0.55862	1.86064	0.00273224	0.00273224	0.0599401	3853	tags=34%, list=16%, signal=29%	542215/100192351/100192350/103636185/100384793/103651348/100193705/100191549/100279867/100274119/100273302/103630426/100282625/100192349/100273311/100191977/100194010/100193220/542520
	zma00902	Monoterpenoid biosynthesis	12	-0.79865	-1.78638	0.003663	0.003663	0.0599401	3744	tags=75%, list=15%, signal=64%	100274235/100282122/100191789/100281076/100273237/100280419/100273052/732758/103654934
	zma00010	Glycolysis / Gluconeogenesis	153	0.459369	1.78389	0.00390625	0.00390625	0.0599401	5636	tags=42%, list=23%, signal=32%	100281688/103635678/103632535/100216767/100037774/542333/542363/100191144/100381624/542578/100280823/542376/100191614/100284774/118472308/100857058/100283899/542759/103634611/103636300/100381658/542358/100282981/103630633/100282738/100282190/542177/542721/100193340/100283452/100280449/732811/100382182/100274579/100272913/100283280/542313/100281464/100272519/541781/542607/542261/542483/100502020/1…
	zma00999	Biosynthesis of various plant secondary metabolites; Including: Crocin biosynthesis, Cannabidiol biosynthesis, Mugineic acid biosynthesis, Pentagalloylglucose biosynthesis, Benzoxazinoid biosynthesis, Gramine biosynthesis, Coumarin biosynthesis, Furanocoumarin biosynthesis, Hordatine biosynthesis, Podophyllotoxin biosynthesis	62	-0.55544	-1.70957	0.00465839	0.00465839	0.0599401	4817	tags=47%, list=20%, signal=38%	100272333/103632152/100282204/542684/100281854/103649789/100192631/100279822/100191838/100279348/100502335/103630392/100274317/100274507/100193998/100282324/100147731/100194360/100273163/103626358/778439/100193424/103654957/100191831/110386945/541637/109942391/103634563/542480
	zma01230	Biosynthesis of amino acids	259	0.351002	1.48924	0.00487805	0.00487805	0.0599401	5920	tags=31%, list=24%, signal=24%	542215/100192351/100192350/100281688/103636185/100281038/100281928/100384793/100037774/542333/778431/103651348/100193705/100272371/100381624/542578/100280823/100191614/103630430/100274119/100283899/732842/103634611/118473590/100191334/732803/100381658/100282981/103630633/100384514/100282625/542177/100283452/100279573/732811/100217128/100192349/100194039/100274579/100272913/100273311/100191977/100…
	zma00941	Flavonoid biosynthesis	36	0.573602	1.73963	0.00515464	0.00515464	0.0599401	406	tags=19%, list=2%, signal=19%	100286107/100279986/542712/103640406/103646891/100127010/103636555
	zma03010	Ribosome	326	0.548139	2.37205	0.00549451	0.00549451	0.0599401	5717	tags=70%, list=23%, signal=54%	103633018/103652281/100192505/103637734/103631148/845216/100285759/100280220/103643066/100276789/542640/542458/100193699/100193672/100280577/103629793/100281626/100194265/100191612/100191190/100194209/103654822/100282010/100286375/100216896/100193874/100216841/100280801/100280866/100281633/100283043/100272465/100286294/100217171/100282547/100280770/100285578/100283332/100194313/542323/542337/1002…
	zma04145	Phagosome	89	0.430913	1.56911	0.00619195	0.00619195	0.0619195	9343	tags=67%, list=38%, signal=42%	103630662/542248/542239/541930/100383576/542503/100382290/542417/100037751/103643947/103650943/100192065/100274416/541773/542418/103643294/542618/100381303/100280916/103651402/542732/100282032/542395/100280574/100286306/103647744/541774/542416/100273246/103625832/100273658/100192024/100282544/100276798/100217058/103629648/100282817/100282598/100280083/103639351/100193453/100280289/100283291/54232…
	zma00906	Carotenoid biosynthesis	34	-0.631307	-1.75417	0.00827815	0.00827815	0.0764137	5453	tags=56%, list=22%, signal=44%	542604/100383002/100502522/103627895/100136882/100194203/732775/100384384/109940986/103634451/100191697/732825/100502521/103648116/542686/103626043/103647484/103648268/100281391
	zma00270	Cysteine and methionine metabolism	118	-0.436404	-1.47113	0.0113636	0.0113636	0.0974026	4466	tags=33%, list=18%, signal=27%	100279822/100282341/100193743/100191523/100191838/100502310/100216722/732743/103631673/103644325/103646970/103631778/100282324/542191/100282134/100272866/100279553/100194360/103628432/103648465/100216585/100283015/100193148/100217270/100276369/100273458/542136/542137/103633793/100279981/103628892/103645417/100191831/110386945/541637/109942391/103646045/103634563/542480
	zma03030	DNA replication	56	0.482636	1.60756	0.0136612	0.0136612	0.10929	8152	tags=55%, list=33%, signal=37%	100285013/100383890/100273584/103641202/100273978/100272286/103640768/100285474/100283481/100193296/100279971/100191506/100382167/103627197/103626668/103648427/103631463/542425/100191752/542504/542206/542738/542357/100285427/100216891/100281587/100282197/103625817/100384853/100501077/103648088
	zma03008	Ribosome biogenesis in eukaryotes	97	0.396261	1.46314	0.01875	0.01875	0.130354	7111	tags=56%, list=29%, signal=40%	103638047/100280516/103639139/100273853/109939150/103645842/107521957/100283975/100383935/118473283/103649956/103647603/100280396/100280230/109941429/100282167/100193012/100279072/103642006/103639131/100284315/100382806/103632249/100502498/100279258/100194088/100383022/100193550/103625708/103634670/103648282/109945944/100303837/100193260/100501489/103633413/100276770/100279295/103649964/100275579…
	zma00592	alpha-Linolenic acid metabolism	45	-0.538337	-1.58015	0.0191693	0.0191693	0.130354	2477	tags=33%, list=10%, signal=30%	103644066/732731/100216803/542163/100037808/732733/100279433/100037807/103625850/103642039/732732/732815/732822/103647563/100281695
	zma00030	Pentose phosphate pathway	63	0.4424	1.50065	0.0195531	0.0195531	0.130354	6068	tags=40%, list=25%, signal=30%	100281688/100383765/103632535/100216767/118472308/542358/103630633/100282190/100282975/542721/100193340/100280449/100382182/100272913/542313/100281464/542261/100502020/100192890/103629493/100281068/100285298/100304292/100856973/103651489
	zma00710	Carbon fixation in photosynthetic organisms	76	0.424836	1.50704	0.0208333	0.0208333	0.131579	5697	tags=45%, list=23%, signal=35%	542290/103635678/100216767/100384793/100037774/542333/100193705/100381624/100280823/542368/100274119/542759/100282981/100193663/542393/100191460/100274579/100272913/100273311/100280767/100279574/100273428/100274264/542261/100272900/100502020/542718/103649899/100281068/100272481/542598/100194114/100285298/100384708
	zma03050	Proteasome	78	0.397799	1.42334	0.033033	0.033033	0.198198	11022	tags=76%, list=45%, signal=42%	100217091/100285832/100282612/103648810/100282158/111589223/100274928/100382157/100272427/100216834/100383510/100283395/103654920/100194311/542021/100282100/100282792/100191154/103649975/542160/100384330/100283005/100281651/103642042/100282303/100382965/100282105/100274112/100283656/100276453/100282470/100274559/103627906/100273945/100382103/100273032/100037815/100283546/100283940/100191806/10365…
	zma03440	Homologous recombination	58	0.420449	1.40763	0.0392157	0.0392157	0.22409	4073	tags=28%, list=16%, signal=23%	100273582/100285013/100191367/100273997/100273584/100216554/100216934/103641202/103633601/100125648/100272286/100285474/100283481/103627774/100279971/100382167
	zma00190	Oxidative phosphorylation	141	0.332049	1.28115	0.0446097	0.0446097	0.243325	7799	tags=47%, list=32%, signal=32%	100283003/100285174/100279930/103649017/100277932/100383904/103638716/100276847/100384742/100280460/100272302/100284505/100192808/103632998/100192065/100274416/100277027/100501351/100283237/100277290/100502231/103651402/100278643/845190/100282566/100282032/100280574/100286306/103647744/100280144/100384526/100382870/100273246/100193844/100194151/100383938/100282544/542267/100273176/100282384/10028…
SCIII	zma04075	Plant hormone signal transduction	292	-0.381131	-1.52658	0.00151745	0.00151745	0.0399734	6050	tags=39%, list=25%, signal=30%	100191728/107436075/100191211/100194025/100502540/100281468/103626102/100282729/100284388/103647411/100282657/100192007/100284319/100285200/103631918/541633/100280367/103642379/100281448/100384587/100381959/100281912/103636577/103636724/103650192/100502433/100191412/100283313/103636232/100193967/103633350/100382238/103647370/100285223/100281022/100284398/100282471/100281196/100283932/100502214/10…
	zma00940	Phenylpropanoid biosynthesis	170	-0.61239	-2.33816	0.00155763	0.00155763	0.0399734	3313	tags=42%, list=13%, signal=37%	100281073/100280077/103635713/542464/103643375/100382272/103634415/100192482/100282124/103631868/100216819/100273283/542735/103647881/100217011/100274274/103651385/109946031/103637680/100381507/100284998/103642599/100191304/103626369/100274269/103650629/100382972/100273061/100281286/103638909/100273055/100383495/103639086/103641348/107546759/100382459/100382033/103629160/103627433/100276245/10021…
	zma00909	Sesquiterpenoid and triterpenoid biosynthesis	13	0.809034	1.92552	0.00228311	0.00228311	0.0399734	847	tags=38%, list=3%, signal=37%	542688/103641097/541974/100285643/100274033
	zma00196	Photosynthesis - antenna proteins	17	0.855876	2.16243	0.00228833	0.00228833	0.0399734	1011	tags=59%, list=4%, signal=56%	542478/100281791/100193833/100273427/100282512/100280410/100281248/103651575/100273752/100282054
	zma03030	DNA replication	56	0.573977	1.89043	0.00244499	0.00244499	0.0399734	7161	tags=73%, list=29%, signal=52%	100383890/100285013/100285903/100279971/100273978/103627197/542504/100194011/103631463/100216620/103625817/100272286/103626668/100501077/100279753/100304310/100384853/100191506/542206/100283481/100216891/100382167/100280690/542738/542357/100281587/100282197/100383660/103648088/103640768/103641202/100194009/100383139/100282897/100193296/100285474/100191752/100193357/103648427/103627452/103642101
	zma00970	Aminoacyl-tRNA biosynthesis	63	0.534637	1.79886	0.00248139	0.00248139	0.0399734	9787	tags=76%, list=40%, signal=46%	541989/100282733/100192902/103648437/100284312/100273907/100285944/100272738/100194398/103654058/100280495/100194290/103635898/100281742/100381695/103647355/100273774/100281485/100272291/100280512/103638191/100272402/100384866/103631953/100282419/109940924/100280365/103645798/100273441/100282839/103639438/103643444/113687172/100283555/103643028/103641233/100383320/100279212/100281059/100217176/10…
	zma03008	Ribosome biogenesis in eukaryotes	97	0.468621	1.71635	0.00251889	0.00251889	0.0399734	7274	tags=57%, list=29%, signal=40%	103637360/109944832/100274243/103645842/103643972/100280516/109939150/100280230/542628/100276745/103634670/100501489/100383935/100280396/103638047/100274475/103647603/100193563/109941429/100283975/103649964/103639139/100383022/103639131/103625708/100193557/100194088/103634616/103634524/103632249/100193155/100502498/100193917/100501283/100282167/100275579/103652757/103630487/100193012/100284024/10…
	zma01230	Biosynthesis of amino acids	259	0.350622	1.46499	0.00289017	0.00289017	0.0399734	1806	tags=10%, list=7%, signal=10%	103651775/100274124/100192350/100381658/100192351/100381624/100281688/100273196/542215/100274515/100281255/103654943/100274239/103636185/100281928/100272371/118473590/778431/542400/100279553/109623449/100282205/103633296/100286258/100193705/100216991/100170238
	zma00520	Amino sugar and nucleotide sugar metabolism	155	-0.399866	-1.51038	0.00316456	0.00316456	0.0399734	6111	tags=42%, list=25%, signal=32%	103649574/542159/542721/118473163/103649684/542072/100273781/100285088/100283867/103638108/100272968/100383103/103651489/100282597/100285211/542510/100191862/103654257/100191592/100281825/100286359/542127/100191620/100216739/103633593/103630226/100191391/100281365/100191463/103625925/100383811/100272867/100284575/100284107/100272553/103632227/100274383/100282614/100383770/100280325/100272600/1036…
	zma04712	Circadian rhythm - plant	55	0.555774	1.8338	0.00485437	0.00485437	0.0514176	4820	tags=49%, list=20%, signal=40%	100286123/103644048/115101004/103633010/100285170/100273598/100274243/103647963/100272803/100127530/100383277/100284201/100381775/100127527/100272683/542628/100286122/100147733/100383534/103641361/100280240/103633607/100382453/100281433/100381811/100279726/103633683
	zma00260	Glycine, serine and threonine metabolism	70	0.455773	1.57484	0.00497512	0.00497512	0.0514176	4625	tags=29%, list=19%, signal=23%	103651775/100274124/100381658/103638939/100193709/100281928/100279553/109623449/109943263/100170238/100279249/100191334/100286311/778432/103651345/100285190/100279491/100136881/100280775/542708
	zma03013	Nucleocytoplasmic transport	133	0.391974	1.50084	0.0078125	0.0078125	0.0726417	7263	tags=46%, list=29%, signal=33%	103637360/103639534/103626805/103646037/100383460/103627442/100193617/100286267/103626170/103635758/100273670/100304415/103639423/100272594/103625708/103628806/103632918/100384150/100381804/100382780/100272301/100273504/103629871/103630277/100384390/100276843/103635497/100381870/100194141/100279122/100193455/103647957/103633416/100194061/100383753/100285840/103643456/103625787/100304252/103625943…
	zma01200	Carbon metabolism	279	0.314065	1.32245	0.00900901	0.00900901	0.0726417	1805	tags=9%, list=7%, signal=9%	103651775/103633249/100383765/103635678/100283469/100381658/542290/100381624/100281688/100273196/103638939/100274515/542372/100283686/103648212/100193709/100285987/100281928/100272371/100216767/100273700/103633296/100193705/100216991/109943263/100279574
	zma00195	Photosynthesis	50	0.510339	1.65966	0.00938967	0.00938967	0.0726417	2267	tags=36%, list=9%, signal=33%	100192779/103629356/100286020/100282043/542558/542279/541626/542605/100272890/100281646/100283835/100191684/103640891/100273354/100273117/100280994/103644035/542126
	zma00190	Oxidative phosphorylation	141	-0.387685	-1.44512	0.00958466	0.00958466	0.0726417	7995	tags=60%, list=32%, signal=41%	103632677/100273417/100284505/100194151/100272302/100278643/100281241/100193844/100192808/100283003/100282522/100381766/103639351/100127013/100502231/115874042/100275277/103651342/100281028/103629626/100277027/103647744/100282384/100194239/100280404/100281167/103626681/100280324/103634509/542327/542052/100282690/100283904/109939200/100285442/100282598/100272681/100216827/100283102/100191627/10365…
	zma00430	Taurine and hypotaurine metabolism	13	-0.707525	-1.65539	0.0106383	0.0106383	0.0755879	542	tags=69%, list=2%, signal=68%	100284394/100191549/103652784/103629978/103634830/100193552/100381655/103631795/103639506
	zma00950	Isoquinoline alkaloid biosynthesis	19	0.642963	1.69374	0.0137615	0.0137615	0.0895857	1580	tags=26%, list=6%, signal=25%	100383025/100279950/100283178/100279205/103641967
	zma03430	Mismatch repair	38	0.542075	1.65619	0.0141844	0.0141844	0.0895857	7522	tags=68%, list=30%, signal=48%	109944383/100383890/103647640/100285013/100285903/100279971/103642206/100194011/103625817/100272286/103645753/103636271/100283481/100382167/542357/100282197/103648088/542626/100381439/100285474/103653697/100193357/103627452/542006/100279876/100383373
	zma00941	Flavonoid biosynthesis	36	0.53366	1.60923	0.0165877	0.0165877	0.0992504	795	tags=25%, list=3%, signal=24%	103640406/100286107/542712/100284063/100127010/100284018/100279986/103646891/100304329
	zma00350	Tyrosine metabolism	39	0.509889	1.55067	0.0191388	0.0191388	0.104312	1580	tags=13%, list=6%, signal=12%	100383025/100279950/100283178/100279205/103641967
	zma01250	Biosynthesis of nucleotide sugars	104	-0.398705	-1.42326	0.0195122	0.0195122	0.104312	6111	tags=44%, list=25%, signal=33%	103649574/542159/542721/118473163/542072/100273781/100285088/100283867/103638108/100384615/100383103/103651489/100285211/542510/100191862/100286359/542127/103633593/103630226/100191391/100281365/100191463/103625925/100272867/100284107/100272553/100274383/100282614/100280325/100277365/100272600/103636300/100192102/100274751/100272536/100191846/103637966/100191165/103647830/100279549/103654924/1099…
	zma04016	MAPK signaling pathway - plant	159	-0.360857	-1.36751	0.0201863	0.0201863	0.104312	6222	tags=42%, list=25%, signal=31%	542533/103652527/100194025/100281468/100281756/100282729/103645931/100282657/100284319/100273609/103631918/100279294/100381315/100101532/541661/103636577/100283650/542230/100382238/100383941/103647370/100285223/100191592/100281825/100283932/103651472/103638892/100384302/541694/100383481/103649710/100383746/109941434/100285024/100193330/542420/100136880/103635158/100281160/100283082/100191919/1036…
	zma03440	Homologous recombination	58	0.435598	1.45154	0.0342298	0.0342298	0.164339	8018	tags=60%, list=32%, signal=41%	103633601/100216554/100285013/103630583/100285903/100279971/100125648/100194011/100216934/100191367/103634545/100272286/100284087/100283481/100285133/100382167/103627634/103630322/100280239/100274706/103641202/103645850/103641317/100281664/103646962/100285474/541709/100283593/103627774/103627452/103642101/100383373/100282426/100383032/100273582
	zma00965	Betalain biosynthesis	4	0.864114	1.50645	0.0346939	0.0346939	0.164339	37	tags=50%, list=0%, signal=50%	100383025/100279950
	zma00360	Phenylalanine metabolism	30	0.517876	1.51501	0.0399061	0.0399061	0.181468	1074	tags=10%, list=4%, signal=10%	100383025/100279950/100279205
	zma00780	Biotin metabolism	20	-0.569059	-1.49848	0.0417391	0.0417391	0.182503	8450	tags=70%, list=34%, signal=46%	100279917/100284513/100383498/100280304/100283232/100283818/100274137/100191565/103631989/100285342/100274506/100277126/100273168/103646607
	zma00590	Arachidonic acid metabolism	13	-0.658148	-1.53986	0.0478723	0.0478723	0.196241	3892	tags=46%, list=16%, signal=39%	103634830/100194367/100216649/100191566/103627377/103653744
	zma04145	Phagosome	89	-0.382631	-1.33473	0.0483333	0.0483333	0.196241	9188	tags=60%, list=37%, signal=38%	100280083/103629648/100192024/103651402/542395/103632727/100274416/100283470/542618/100273417/100280916/100283947/100281241/100381766/100383121/103639351/100275277/100381303/103647744/103626681/542327/100272622/100283904/100282598/100283102/542421/542418/100273658/100283291/100037751/103643947/100283666/542416/100285315/100282817/542380/100273246/100273288/103625832/100193359/541930/100382290/100…

[truncated: 2 more sheets: Supplementary Table 11, Supplementary Table 12]
